# Supplementary material
Source: publisher figshare collection journal article supplement (https://acs.figshare.com/ndownloader/files/9641332)
Supplement: Supplementary file 1 [file 9641332]

# Supporting Information.

## Spotlight on Excitonic Coupling in Polymorphic and Textured Anilino Squaraine Thin Films

Frank Balzer,<sup>†</sup> Heiko Kollmann,<sup>‡</sup> Matthias Schulz,<sup>¶</sup> Gregor Schnakenburg,<sup>§</sup> Arne  
Lützen,<sup>¶</sup> Marc Schmidtmann,<sup>||</sup> Christoph Lienau,<sup>‡</sup> Martin Silies,<sup>‡</sup> and Manuela  
Schiek\*,<sup>⊥</sup>

<sup>†</sup>*Mads Clausen Institute, University of Southern Denmark, Alsion 2, DK-6400 Sønderborg,  
Denmark*

<sup>‡</sup>*Ultrafast Nanooptics, Institute of Physics, University of Oldenburg, D-26111 Oldenburg,  
Germany*

<sup>¶</sup>*Kekulé Institute of Organic Chemistry and Biochemistry,  
Rheinische-Friedrich-Wilhelms-University of Bonn, Gerhard-Domagk-Str. 1, D-53121  
Bonn, Germany*

<sup>§</sup>*Institute of Inorganic Chemistry, Rheinische-Friedrich-Wilhelms-University of Bonn,  
Gerhard-Domagk-Str. 1, D-53121 Bonn, Germany*

<sup>||</sup>*Department of Chemistry, University of Oldenburg, D-26111 Oldenburg, Germany*

<sup>⊥</sup>*Energy and Semiconductor Research Laboratory, Institute of Physics, University of  
Oldenburg, D-26111 Oldenburg, Germany*

E-mail: manuela.schiek@uni-oldenburg.de

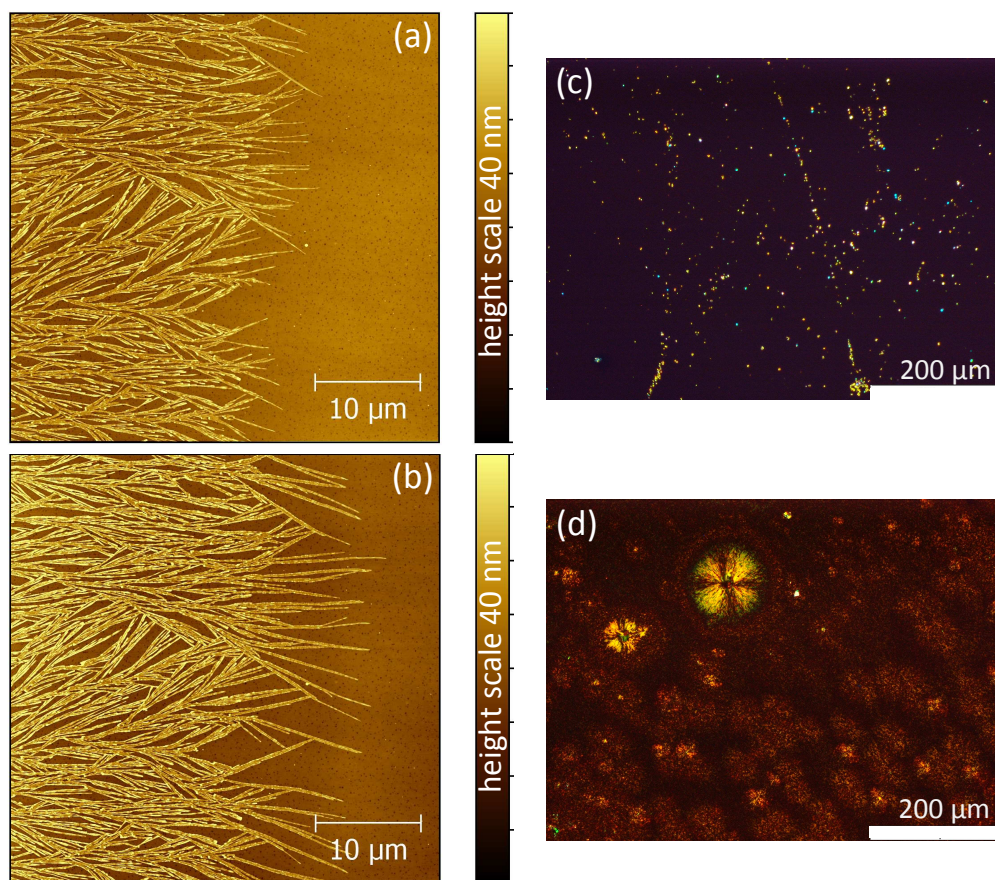

Figure S1: AFM images monitoring the growth of a sunflower in an amorphous SQIB film, time between (a) and (b) are approx. 42 hours. Optical microscopy images between crossed polarizers of (c) a fresh SQIB thin film annealed at 60 °C and (d) the same sample after two months storage.

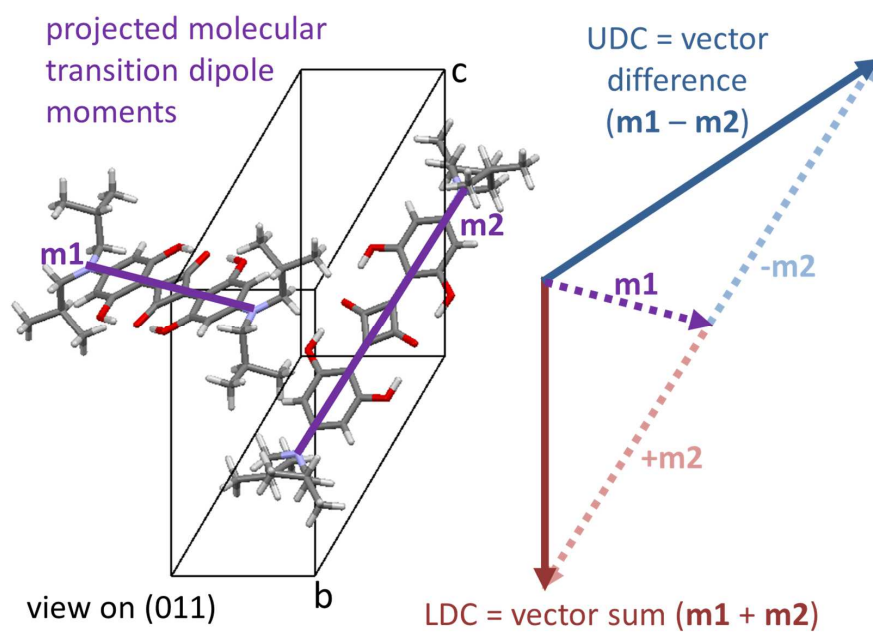

Figure S2: Graphical vector addition (red arrow, LDC) and subtraction (blue arrow, UDC) of the molecular transition dipole moments (violet color) for the monoclinic polymorph (sunflowers).

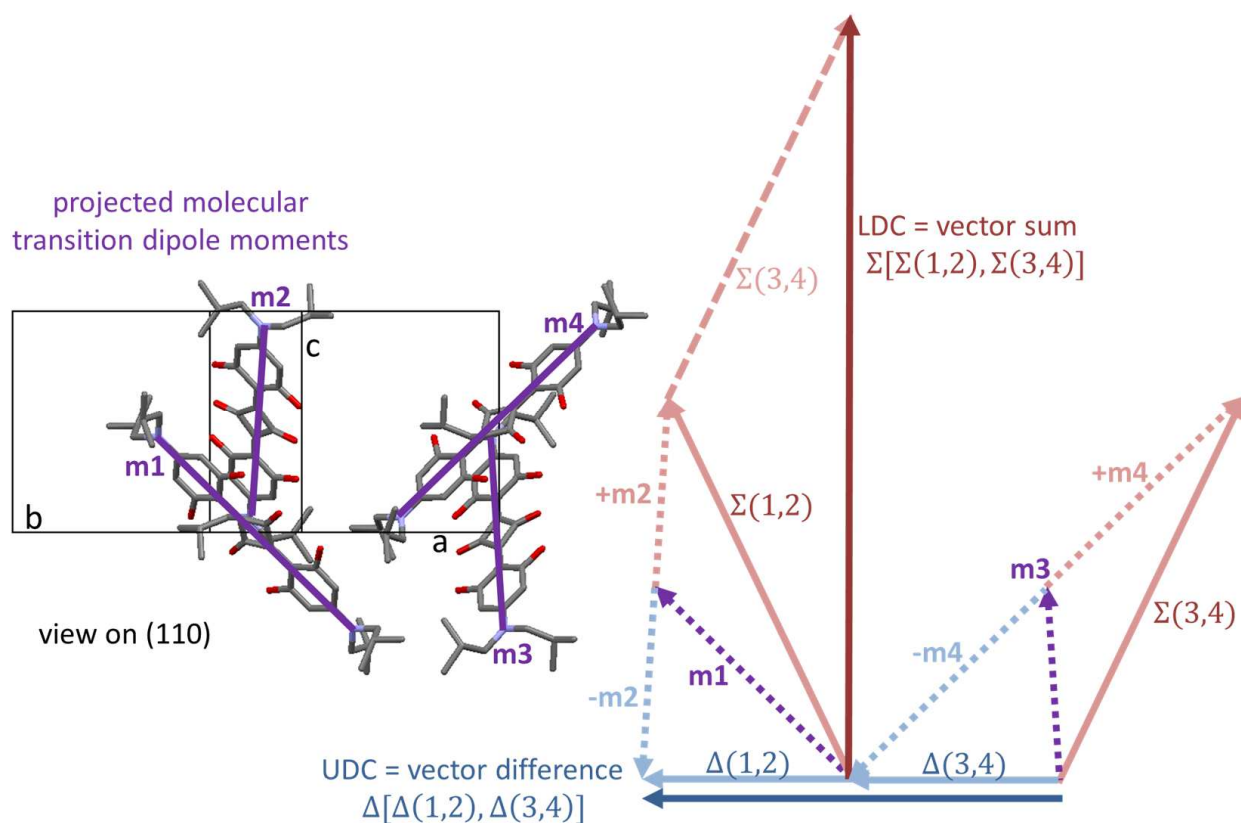

Figure S3: Graphical vector addition (red arrow, LDC) and subtraction (blue arrow, UDC) of the molecular transition dipole moments (violet color) for the orthorhombic polymorph (platelets). At first, the vector sums  $\Sigma$  [differences  $\Delta$ ] of the two pairs of stacked molecules are calculated:  $\Sigma(1, 2) = m1 + m2$  [ $\Delta(1, 2) = m1 - m2$ ] and  $\Sigma(3, 4) = m3 + m4$  [ $\Delta(3, 4) = m3 - m4$ ]. Secondly, the vector sum [difference] of the stacked pairs are graphically added [subtracted]:  $\Sigma(1, 2) + \Sigma(3, 4) = \text{LDC}$  [ $\Delta(1, 2) - \Delta(3, 4) = \text{UDC}$ ], resulting in the overall Davydov components.

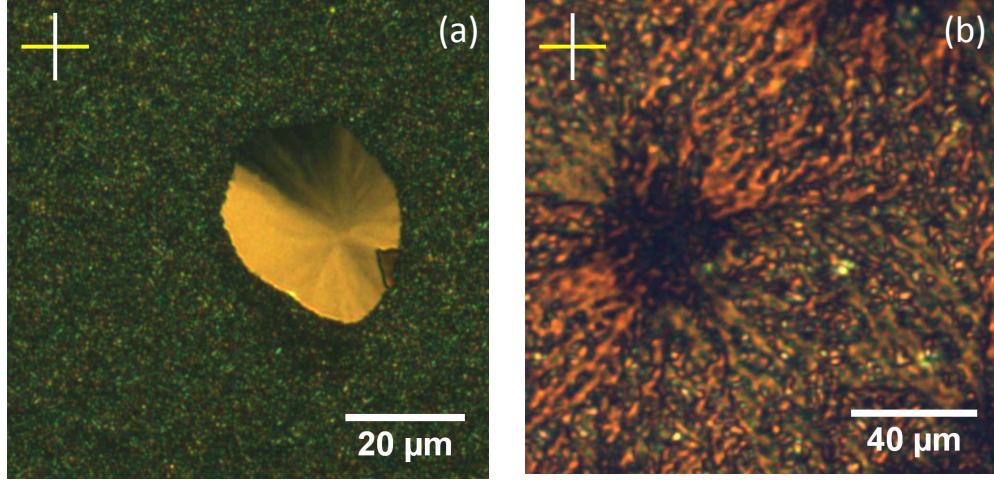

Figure S4: Birefringence of a single SQIB platelet (a) and a sunflower (b). The cross indicates the direction of polarizer (white) and analyzer (orange). Screenshots of the movie files.

In Figure S4, screenshots of two movies are displayed. In (a) a golden platelet is rotated between two crossed polarizers under a polarized light microscope. The images are observed in transmission. The polarizer and analyzer directions are depicted by a white and orange line, respectively, in the upper left. The same is shown in (b) for a sunflower. The movies are available as downloads.

A total of  $N = 73$  images are recorded over a rotation angle  $\phi$  of  $360^\circ$ . From the intensity variation  $I_n^{x,y}$  ( $n = 0 \dots N - 1$ ) of each pixel at image position  $(x, y)$ , the discrete Fourier coefficients  $\tilde{I}_\gamma(x, y)$  are determined using

$$\tilde{I}_\gamma(x, y) = \frac{1}{N} \sum_{n=0}^{N-1} I_n^{x,y} e^{-i2\pi\gamma n/N} \quad . \quad (1)$$

From this, the extinction angle  $\phi_{\text{ext}}$ , i.e. the angle for which the intensity is smallest, is extracted via

$$\phi_{\text{ext}}(x, y) = \frac{1}{2} \arg \left( \tilde{I}_{\gamma=4}^*(x, y) + i \left| \tilde{I}_{\gamma=4}(x, y) \right| \right) + \frac{\pi}{8} \quad . \quad (2)$$

Eventually, a value of  $\pi/2$  is added to select the tangential extinction angle over the radial one.

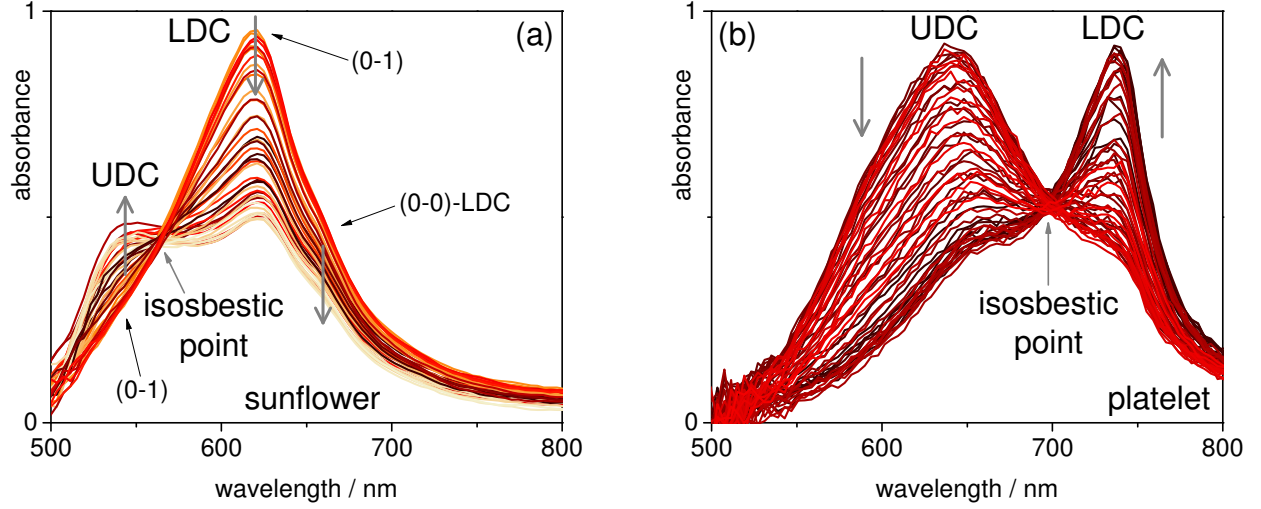

Figure S5: Absorption spectra recorded with a single polarizer dependent on the rotation angle of the polarizer (a) within a typical sunflower, and (b) on a typical platelet area. UDC = Upper Davydov Component; LDC = Lower Davydov Component. Note that for the sunflower in (a) the oscillator strength of the (0-1)-LDC might appear stronger than it actually is due to spectral overlap with the not resolved (0-0)-UDC.
